# Supplementary material for: Cancer worry among BRCA1/2 pathogenic variant carriers choosing surgery to prevent tubal/ovarian cancer: course over time and associated factors
Source: PubMed Central journal article supplement (PMC8857097; doi:10.1007/s00520-021-06726-4), 2022-01-08

1 **Cancer Worry among *BRCA1/2* pathogenic variant carriers choosing surgery**  
2 **to prevent tubal/ovarian cancer: course over time and associated factors**

3 Majke H.D. van Bommel<sup>1</sup>, Miranda P. Steenbeek<sup>1</sup>, Joanna IntHout<sup>2</sup>, Rosella P.M.G. Hermens<sup>3</sup>,  
4 Nicoline Hoogerbrugge<sup>4</sup>, Marline G. Harmsen<sup>1</sup>, Helena C. van Doorn<sup>5</sup>, Marian J.E. Mourits<sup>6</sup>, Marc van  
5 Beurden<sup>7</sup>, Ronald P. Zweemer<sup>8</sup>, Katja N. Gaarenstroom<sup>9</sup>, Brigitte F.M. Slangen<sup>10</sup>, Monique M.A.  
6 Brood-van Zanten<sup>7,11</sup>, M. Caroline Vos<sup>12</sup>, Jurgen M. Piek<sup>13</sup>, Luc R.C.W. van Lonkhuijzen<sup>11</sup>, Mirjam J.A.  
7 Apperloo<sup>14</sup>, Sjors F.P.J. Coppus<sup>15</sup>, Judith B. Prins<sup>16</sup>, José A.E. Custers<sup>16</sup>, Joanne A. de Hullu<sup>1</sup>

8

9 **Corresponding author**

10 Name: Majke van Bommel

11 Affiliation: Radboud university medical center, Radboud Institute for Health Sciences, Department of  
12 Obstetrics and Gynaecology, Nijmegen, The Netherlands.

13 E-mail address: [majke.vanbommel@radboudumc.nl](mailto:majke.vanbommel@radboudumc.nl)

14

15

16

17 **Online Resource 1.** Flow diagram of participating BRCA1/2-PV carriers (CONSORT)

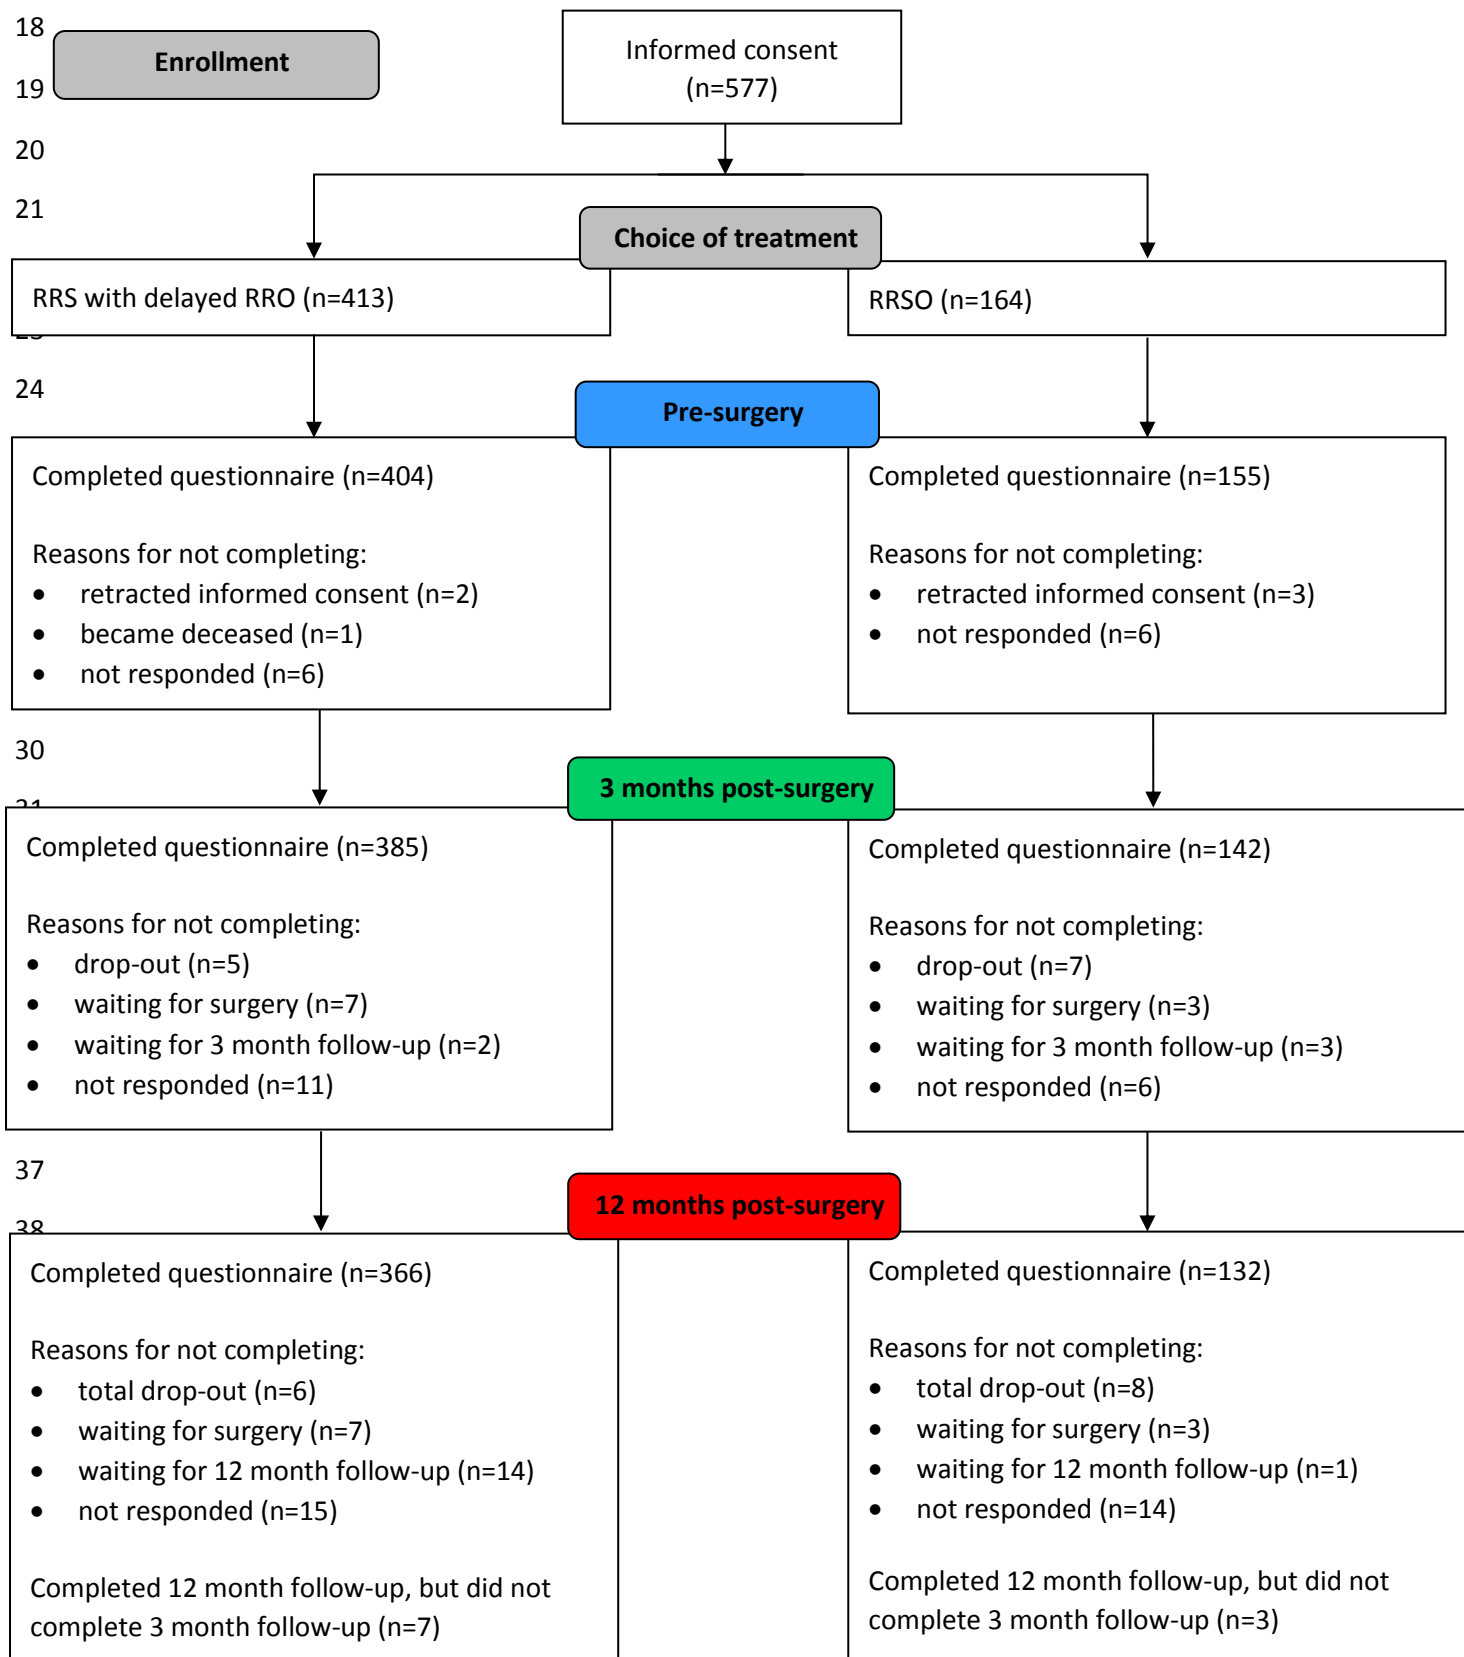

Supplement: 520_2021_6726_MOESM1_ESM.pdf [file 520_2021_6726_MOESM1_ESM.pdf]
