# Supplementary material for: Cancer worry among BRCA1/2 pathogenic variant carriers choosing surgery to prevent tubal/ovarian cancer: course over time and associated factors
Source: PubMed Central journal article supplement (PMC8857097; doi:10.1007/s00520-021-06726-4), 2022-01-08
Supplement: 520_2021_6726_MOESM2_ESM.pdf [file 520_2021_6726_MOESM2_ESM.pdf]

1 **Cancer Worry among *BRCA1/2* pathogenic variant carriers choosing surgery**  
2 **to prevent tubal/ovarian cancer: course over time and associated factors**

3 Majke H.D. van Bommel<sup>1</sup>, Miranda P. Steenbeek<sup>1</sup>, Joanna IntHout<sup>2</sup>, Rosella P.M.G. Hermens<sup>3</sup>,  
4 Nicoline Hoogerbrugge<sup>4</sup>, Marline G. Harmsen<sup>1</sup>, Helena C. van Doorn<sup>5</sup>, Marian J.E. Mourits<sup>6</sup>, Marc van  
5 Beurden<sup>7</sup>, Ronald P. Zweemer<sup>8</sup>, Katja N. Gaarenstroom<sup>9</sup>, Brigitte F.M. Slangen<sup>10</sup>, Monique M.A.  
6 Brood-van Zanten<sup>7,11</sup>, M. Caroline Vos<sup>12</sup>, Jurgen M. Piek<sup>13</sup>, Luc R.C.W. van Lonkhuijzen<sup>11</sup>, Mirjam J.A.  
7 Apperloo<sup>14</sup>, Sjors F.P.J. Coppus<sup>15</sup>, Judith B. Prins<sup>16</sup>, José A.E. Custers<sup>16</sup>, Joanne A. de Hullu<sup>1</sup>

8

9 **Corresponding author**

10 Name: Majke van Bommel

11 Affiliation: Radboud university medical center, Radboud Institute for Health Sciences, Department of  
12 Obstetrics and Gynaecology, Nijmegen, The Netherlands.

13 E-mail address: [majke.vanbommel@radboudumc.nl](mailto:majke.vanbommel@radboudumc.nl)

14

15

16

17 **Online Resource 2. Parameters of the LCGA-models with different number of classes**

| No. of classes | BIC      | LMR-LRT | BLRT  | Entropy | n                                                                 | Posterior Probabilities              | Intercept (95% CI)                                                                                                                | Slope linear (95% CI) (per time point)                                                                              |
|----------------|----------|---------|-------|---------|-------------------------------------------------------------------|--------------------------------------|-----------------------------------------------------------------------------------------------------------------------------------|---------------------------------------------------------------------------------------------------------------------|
| 1              | 7772.891 |         |       |         |                                                                   |                                      | 14.24 (13.91; 14.56)***                                                                                                           | -0.84 (-0.99; 0.69)***                                                                                              |
| 2              | 7934.789 | .0005   | .0000 | .873    | 87 (16.6%)<br>438 (83.4%)                                         | .952<br>.967                         | 19.33 (17.62; 21.04)***<br>13.12 (12.75; 13.5)***                                                                                 | -0.74 (-1.3; 0.17)**<br>-0.89 (-1.04; 0.74)***                                                                      |
| 3              | 7768.655 | .0022   | .0000 | .804    | 296 (56.4%)<br>33 (6.3%)<br>196 (37.3%)                           | .918<br>.959<br>.879                 | 12.08 (11.61; 12.56)***<br>21.56 (19.99; 23.13)***<br>16.2 (15.41; 16.98)***                                                      | -0.87 (-1.02; 0.71)***<br>-0.01 (-0.69; 0.66)<br>-0.91 (-1.23; 0.59)***                                             |
| 4              | 7711.554 | .0052   | .0000 | .790    | 225 (42.9%)<br>24 (4.6%)<br>60 (11.4%)<br>216 (41.1%)             | .862<br>.920<br>.879<br>.899         | 14.76 (14.32; 15.21)***<br>22.44 (20.56; 24.32)***<br>18.89 (17.76; 20.03)***<br>11.49 (11.13; 11.86)***                          | -0.83 (-1.12; 0.54)***<br>0.09 (-0.84; 1.02)<br>-1.18 (-2.09; 0.27)*<br>-0.86 (-1.03; 0.7)***                       |
| 5              | 7703.974 | .1633   | .0000 | .789    | 27 (5.1%)<br>31 (5.9%)<br>195 (37.1%)<br>48 (9.1%)<br>224 (42.7%) | .930<br>.830<br>.900<br>.797<br>.839 | 22.17 (20.61; 23.73)***<br>20.45 (19.6; 21.31)***<br>11.4 (11.03; 11.77)***<br>15.91 (14.14; 17.67)***<br>14.62 (14.18; 15.07)*** | 0.16 (-0.66; 0.99)<br>-2.82 (-4; 1.64)***<br>-0.86 (-1.04; 0.68)***<br>0.87 (0.21; 1.52)**<br>-0.97 (-1.3; 0.64)*** |

18 BIC, Bayesian Information Criterion; LMR-LRT, Vuong-Lo-Mendell Rubin Likelihood Ratio Test; BLRT,

19 Bootstrap Likelihood Ratio Test; CI, confidence interval

20 \*p<0.05. \*\*p<0.01. \*\*\*p<0.001

21 The three-class model was considered most appropriate because of its fit indices and clinical  
 22 interpretability. In the three-class model, compared with the two-class model, the BIC was better,  
 23 but the entropy was lower. The posterior probabilities were similar for the two and three-class  
 24 model. Compared with the four-class mode,. in the three-class model, the BIC was somewhat higher,  
 25 whereas other fit indices were similar. In the four-class model, however, a class was identified  
 26 including only 24 (<5%) women, limiting clinical interpretability.
