# Supplementary material for: Cancer worry among BRCA1/2 pathogenic variant carriers choosing surgery to prevent tubal/ovarian cancer: course over time and associated factors
Source: PubMed Central journal article supplement (PMC8857097; doi:10.1007/s00520-021-06726-4), 2022-01-08
Supplement: 520_2021_6726_MOESM3_ESM.pdf [file 520_2021_6726_MOESM3_ESM.pdf]

1 **Cancer Worry among *BRCA1/2* pathogenic variant carriers choosing surgery**  
2 **to prevent tubal/ovarian cancer: course over time and associated factors**

3 Majke H.D. van Bommel<sup>1</sup>, Miranda P. Steenbeek<sup>1</sup>, Joanna IntHout<sup>2</sup>, Rosella P.M.G. Hermens<sup>3</sup>,  
4 Nicoline Hoogerbrugge<sup>4</sup>, Marline G. Harmsen<sup>1</sup>, Helena C. van Doorn<sup>5</sup>, Marian J.E. Mourits<sup>6</sup>, Marc van  
5 Beurden<sup>7</sup>, Ronald P. Zweemer<sup>8</sup>, Katja N. Gaarenstroom<sup>9</sup>, Brigitte F.M. Slangen<sup>10</sup>, Monique M.A.  
6 Brood-van Zanten<sup>7,11</sup>, M. Caroline Vos<sup>12</sup>, Jurgen M. Piek<sup>13</sup>, Luc R.C.W. van Lonkhuijzen<sup>11</sup>, Mirjam J.A.  
7 Apperloo<sup>14</sup>, Sjors F.P.J. Coppus<sup>15</sup>, Judith B. Prins<sup>16</sup>, José A.E. Custers<sup>16</sup>, Joanne A. de Hullu<sup>1</sup>

8

9 **Corresponding author**

10 Name: Majke van Bommel

11 Affiliation: Radboud university medical center, Radboud Institute for Health Sciences, Department of  
12 Obstetrics and Gynaecology, Nijmegen, The Netherlands.

13 E-mail address: [majke.vanbommel@radboudumc.nl](mailto:majke.vanbommel@radboudumc.nl)

14

15

16

17 **Online Resource 3.** Variables associated with pre-surgical cancer worry in the three groups based on  
 18 a validated cut-off score

|                                                           |       | Persistent<br>low<br>(n=173) | Fluctuating<br>(n=209) | Persistent<br>high<br>(n=106) | Total<br>group<br>(n=577) | p-<br>value |
|-----------------------------------------------------------|-------|------------------------------|------------------------|-------------------------------|---------------------------|-------------|
| BRCA-PV type,<br>% BRCA1 / % BRCA2 <sup>a</sup>           |       | 49.1 / 50.9                  | 51.7 / 48.3            | 51.9 / 48.1                   | 51.5 / 48.5               | .858        |
| Years since BRCA<br>diagnosis, mean (SD) <sup>b</sup>     |       | 5.4 (4.7)                    | 4.7 (4.6)              | 4.6 (4.5)                     | 5.0 (4.6)                 | .208        |
| Personal history of breast<br>cancer, % <sup>a</sup>      |       | 9.2                          | 11.0                   | 31.1                          | 14.3                      | <.001       |
| Emotional instability, % <sup>a</sup>                     |       | 11.0                         | 19.6                   | 22.6                          | 17.2                      | .021        |
| Previous risk reducing<br>mastectomy, % <sup>a</sup>      |       | 42.2                         | 39.2                   | 34.0                          | 38.6                      | .392        |
| Working a job, % <sup>a</sup>                             |       | 87.9                         | 85.2                   | 78.3                          | 83.5                      | .108        |
| Breast cancer risk<br>perception, mean (SD) <sup>b</sup>  | BRCA1 | 40.4 (35.5)                  | 40.8 (34.3)            | 38.0 (34.2)                   | 39.7 (34.4)               | .891        |
|                                                           | BRCA2 | 43.5 (31.6)                  | 50.6 (29.6)            | 53.9 (30.1)                   | 49.7 (30.7)               | .096        |
| Ovarian cancer risk<br>perception, mean (SD) <sup>b</sup> | BRCA1 | 43.8 (18.4)                  | 45.4 (17.3)            | 48.2 (22.6)                   | 45.7 (18.9)               | .603        |
|                                                           | BRCA2 | 22.8 (16.4)                  | 23.7 (18.1)            | 33.1 (26.0)                   | 25.2 (19.2)               | .099        |

19 BRCA-PV, BRCA pathogenic variant; NS, not significant; SD, standard deviation

20 <sup>a</sup> analysed using Chi-square test; <sup>b</sup> analysed using Kruskal-Wallis test

21
