# Supplementary material for: Cancer worry among BRCA1/2 pathogenic variant carriers choosing surgery to prevent tubal/ovarian cancer: course over time and associated factors
Source: PubMed Central journal article supplement (PMC8857097; doi:10.1007/s00520-021-06726-4), 2022-01-08
Supplement: 520_2021_6726_MOESM4_ESM.pdf [file 520_2021_6726_MOESM4_ESM.pdf]

1 **Cancer Worry among *BRCA1/2* pathogenic variant carriers choosing surgery**  
2 **to prevent tubal/ovarian cancer: course over time and associated factors**

3 Majke H.D. van Bommel<sup>1</sup>, Miranda P. Steenbeek<sup>1</sup>, Joanna IntHout<sup>2</sup>, Rosella P.M.G. Hermens<sup>3</sup>,  
4 Nicoline Hoogerbrugge<sup>4</sup>, Marline G. Harmsen<sup>1</sup>, Helena C. van Doorn<sup>5</sup>, Marian J.E. Mourits<sup>6</sup>, Marc van  
5 Beurden<sup>7</sup>, Ronald P. Zweemer<sup>8</sup>, Katja N. Gaarenstroom<sup>9</sup>, Brigitte F.M. Slangen<sup>10</sup>, Monique M.A.  
6 Brood-van Zanten<sup>7,11</sup>, M. Caroline Vos<sup>12</sup>, Jurgen M. Piek<sup>13</sup>, Luc R.C.W. van Lonkhuijzen<sup>11</sup>, Mirjam J.A.  
7 Apperloo<sup>14</sup>, Sjors F.P.J. Coppus<sup>15</sup>, Judith B. Prins<sup>16</sup>, José A.E. Custers<sup>16</sup>, Joanne A. de Hullu<sup>1</sup>

8

9 **Corresponding author**

10 Name: Majke van Bommel

11 Affiliation: Radboud university medical center, Radboud Institute for Health Sciences, Department of  
12 Obstetrics and Gynaecology, Nijmegen, The Netherlands.

13 E-mail address: [majke.vanbommel@radboudumc.nl](mailto:majke.vanbommel@radboudumc.nl)

14

15

16

17 **Online Resource 4.** Extension of Table 3, characteristics that were evaluated whether or not they  
 18 were associated with membership in a class with similar patterns of cancer worry over time; low  
 19 declining class versus high stable and high declining class

|                                               | Class          | Multinomial logistic regression |               |         |
|-----------------------------------------------|----------------|---------------------------------|---------------|---------|
|                                               |                | OR                              | 95%CI         | p-value |
| <i>BRCA2</i> -PV type                         | Low declining  | 1                               |               |         |
|                                               | High stable    | 1.822                           | 0.865; 3.839  | .114    |
|                                               | High declining | 0.849                           | 0.591; 1.219  | .374    |
| Married/relationship                          | Low declining  | 1                               |               |         |
|                                               | High stable    | 1.223                           | 0.346; 4.324  | .754    |
|                                               | High declining | 1.729                           | 0.951; 3.143  | .073    |
| Risk-reducing mastectomy                      | Low declining  | 1                               |               |         |
|                                               | High stable    | 1.043                           | 0.500; 2.177  | .910    |
|                                               | High declining | 0.697                           | 0.479; 1.013  | .059    |
| Choice for novel strategy                     | Low declining  | 1                               |               |         |
|                                               | High stable    | 1.423                           | 0.595; 3.406  | .428    |
|                                               | High declining | 0.958                           | 0.641; 1.431  | .834    |
| Previous cancer other than breast cancer      | Low declining  | 1                               |               |         |
|                                               | High stable    | . <sup>a</sup>                  | .             | .       |
|                                               | High declining | 2.277                           | 0.377; 13.754 | .370    |
| Use of anti-depressants                       | Low declining  | 1                               |               |         |
|                                               | High stable    | . <sup>a</sup>                  | .             | .       |
|                                               | High declining | 1.773                           | 0.864; 3.639  | .119    |
| First degree family history of breast cancer  | Low declining  | 1                               |               |         |
|                                               | High stable    | 0.666                           | 0.308; 1.439  | .301    |
|                                               | High declining | 1.287                           | 0.896; 1.849  | .172    |
| First degree family history of ovarian cancer | Low declining  | 1                               |               |         |
|                                               | High stable    | 1.037                           | 0.379; 2.839  | .944    |
|                                               | High declining | 0.721                           | 0.421; 1.233  | .232    |
| Offspring                                     | Low declining  | 1                               |               |         |
|                                               | High stable    | 1.709                           | 0.389; 7.511  | .478    |
|                                               | High declining | 0.802                           | 0.457; 1.405  | .440    |
| Age, years                                    | Low declining  | 1                               |               |         |
|                                               | High stable    | 0.910                           | 0.823; 1.005  | .063    |

|                                   |                |       |              |      |
|-----------------------------------|----------------|-------|--------------|------|
|                                   | High declining | 0.992 | 0.942; 1.044 | .751 |
| Breast cancer risk perception     | Low declining  | 1     |              |      |
| (per point of increased perceived | High stable    | 1.011 | 0.999; 1.023 | .063 |
| risk)                             | High declining | 1.005 | 1.000; 1.011 | .074 |

20 OR, Odds ratio; CI, confidence interval

21 <sup>a</sup> cannot be calculated because n=0

22
